# Supplementary material
Source: publisher figshare collection journal article supplement (https://acs.figshare.com/ndownloader/files/3878401)
Supplement: Supplementary file 1 [file 3878401]

# Supporting Information: Water Stability and Adsorption in Metal-Organic Frameworks

Nicholas C. Burtch, Himanshu Jasuja, and Krista S. Walton\*

*School of Chemical & Biomolecular Engineering, Georgia Institute of Technology, 311 Ferst Drive NW, Atlanta, Georgia 30332, United States*

E-mail: [krista.walton@chbe.gatech.edu](mailto:krista.walton@chbe.gatech.edu)

## List of Tables

|    |                                                                                                               |     |
|----|---------------------------------------------------------------------------------------------------------------|-----|
| S1 | Criteria for MOF water stability classifications . . . . .                                                    | S4  |
| S2 | Summary of characterization results used in classifying thermodynamically stable MOFs. . . . .                | S5  |
| S3 | Summary of characterization results used in classifying thermodynamically stable MOFs (continued). . . . .    | S6  |
| S4 | Summary of characterization results used in classifying thermodynamically stable MOFs (continued). . . . .    | S7  |
| S5 | Summary of characterization results used in classifying MOFs with high kinetic stability. . . . .             | S8  |
| S6 | Summary of characterization results used in classifying MOFs with high kinetic stability (continued). . . . . | S9  |
| S7 | Summary of characterization results used in classifying MOFs with high kinetic stability (continued). . . . . | S10 |

---

\*To whom correspondence should be addressed

|     |                                                                                                               |     |
|-----|---------------------------------------------------------------------------------------------------------------|-----|
| S8  | Summary of characterization results used in classifying MOFs with high kinetic stability (continued). . . . . | S11 |
| S9  | Summary of characterization results used in classifying MOFs with high kinetic stability (continued). . . . . | S12 |
| S10 | Summary of characterization results used in classifying MOFs with high kinetic stability (continued). . . . . | S13 |
| S11 | Summary of characterization results used in classifying MOFs with high kinetic stability (continued). . . . . | S14 |
| S12 | Summary of characterization results used in classifying MOFs with high kinetic stability (continued). . . . . | S15 |
| S13 | Summary of characterization results used in classifying MOFs with high kinetic stability (continued). . . . . | S16 |
| S14 | Summary of characterization results used in classifying MOFs with high kinetic stability (continued). . . . . | S17 |
| S15 | Summary of characterization results used in classifying MOFs with high kinetic stability (continued). . . . . | S18 |
| S16 | Summary of characterization results used in classifying MOFs with low kinetic stability. . . . .              | S19 |
| S17 | Summary of characterization results used in classifying MOFs with low kinetic stability (continued). . . . .  | S20 |
| S18 | Summary of characterization results used in classifying MOFs with low kinetic stability (continued). . . . .  | S21 |
| S19 | Summary of characterization results used in classifying MOFs with low kinetic stability (continued). . . . .  | S22 |
| S20 | Summary of characterization results used in classifying MOFs with low kinetic stability (continued). . . . .  | S23 |
| S21 | Summary of characterization results used in classifying unstable MOFs. . . .                                  | S24 |

|     |                                                                                                 |     |
|-----|-------------------------------------------------------------------------------------------------|-----|
| S22 | Summary of characterization results used in classifying unstable MOFs (con-<br>tinued). . . . . | S25 |
| S23 | Ligand definitions . . . . .                                                                    | S26 |
| S24 | Ligand definitions (continued) . . . . .                                                        | S27 |

Table S1: Criteria for MOF water stability classifications

| <b>Water Stability Ranking Criteria</b> |                                                                                                                                                                                                             |
|-----------------------------------------|-------------------------------------------------------------------------------------------------------------------------------------------------------------------------------------------------------------|
| <b>Thermodynamically Stable</b>         | <p>Stable after long-term exposure to aqueous solutions:<br/> Week or greater in pure water, day(s) in acidic/basic or boiling conditions<br/> <i>Strong potential for a wide range of applications</i></p> |
| <b>High Kinetic Stability</b>           | <p>Stable after exposure to high humidity conditions:<br/> Decomposes after short exposure times in liquid water<br/> <i>Strong potential for industrial applications with high humidity conditions</i></p> |
| <b>Low Kinetic Stability</b>            | <p>Stable under low humidity conditions<br/> <i>Potential for applications with pre-dried gas conditions</i></p>                                                                                            |
| <b>Unstable</b>                         | <p>Quickly breaks down after any moisture exposure<br/> <i>Potential for applications under moisture-free conditions</i></p>                                                                                |

Table S2: Summary of characterization results used in classifying thermodynamically stable MOFs.

| MOF                                | Conf. | Ref. | Characterization summary                                                                                                                                                         |
|------------------------------------|-------|------|----------------------------------------------------------------------------------------------------------------------------------------------------------------------------------|
| Bio-MOF-14                         | High  | 1    | No loss of PXRD and only minor changes to SEM crystallite image after soaking in water for 2 months. CO <sub>2</sub> uptake nearly unaffected after soaking in water for 30 days |
| MIL-101(Cr)                        | High  | 2    | Loss of PXRD and large loss of BET surface area after exposure to 50% steam at 300°C                                                                                             |
|                                    |       | 3    | Normal adsorption/desorption behavior in vapor isotherm.                                                                                                                         |
|                                    |       | 4    | No change in PXRD after immersion in water at 323 K for one day. Normal water adsorption/desorption behavior in vapor isotherm.                                                  |
|                                    |       | 5    | No change in PXRD or BET surface area after soaking in boiling water for one week.                                                                                               |
|                                    |       | 6    | No change in PXRD or BET surface area after soaking in boiling water for one week.                                                                                               |
|                                    |       | 7    | Small decrease in water capacity after 40 water isobars cycles from 140°C to 40°C at a vapor pressure of 5.6 kPa. No subsequent change in BET surface area or pore volume.       |
|                                    |       | 8    | No change in PXRD or FTIR after soaking in water and acetonitrile for two days.                                                                                                  |
| MIL-101-SO <sub>3</sub> H(Cr)      | High  | 9    | Stated to be "stable" after months in air and various organic solvents at room temperature.                                                                                      |
|                                    |       | 3    | Normal adsorption/desorption behavior in vapor isotherm.                                                                                                                         |
| MIL-96(Al)                         | High  | 10   | No change in PXRD or BET surface area after soaking in boiling water for more than a day.                                                                                        |
|                                    |       | 11   | No change in particle size or surface properties observed from SEM and AFM after immersion in pH 6 water for 100 days.                                                           |
| Ni <sub>3</sub> (BTP) <sub>2</sub> | High  | 12   | No change in PXRD after 40 water isobar cycle tests between 40 and 140°C at 75% RH in helium.                                                                                    |
|                                    |       | 13   | No change in PXRD or BET surface area after two week exposure to boiling aqueous solutions of pH 2-14.                                                                           |
| PCN-222(Fe)                        | High  | 14   | No change in the PXRD or BET surface area after soaking in water, boiling water, and 2 M, 4 M, and 8 M HCl for one day.                                                          |
| PCN-224(M)                         | High  | 15   | No change in PXRD or BET surface area after soaking in pH 0-11 solutions for one day.                                                                                            |

Table S3: Summary of characterization results used in classifying thermodynamically stable MOFs (continued).

| MOF                                                                  | Conf. | Ref. | Characterization summary                                                                                                                                                                                  |
|----------------------------------------------------------------------|-------|------|-----------------------------------------------------------------------------------------------------------------------------------------------------------------------------------------------------------|
| ZIF-8                                                                | High  | 2    | No change in PXRD and a small decrease in BET surface area after exposure to 50 mol% steam at 200°C.                                                                                                      |
|                                                                      |       | 4    | Minor change to PXRD after one day in water at 323 K. No change in PXRD or BET surface area after water adsorption at 298 K.                                                                              |
|                                                                      |       | 16   | No change in PXRD after one week exposure to 80°C benzene, 65°C methanol, or boiling water. No change in PXRD after one day exposure to boiling 0.1M or 8M NaOH solutions.                                |
|                                                                      |       | 17   | No change in PXRD after one week in water. Some additional PXRD peaks after three months of water exposure.                                                                                               |
|                                                                      |       | 18   | No decrease in CO <sub>2</sub> or N <sub>2</sub> capacity or selectivity after as-synthesized material exposed to air at 68% RH at 26°C for three days.                                                   |
| Al-PMOF                                                              | Med.  | 19   | No change in PXRD or dissolution of ligand evidenced from UV/Vis analysis after one week in neutral or pH 5 solution. Loss of crystallinity and ligand dissolution observed after 1 week in pH 8 solution |
| JUC-110                                                              | Med.  | 20   | No change in PXRD after ten days in boiling water. Further stability implied from water isotherm behavior and GC water/alcohol separation performance.                                                    |
| MIL-100(Cr)                                                          | Med.  | 17   | No change in PXRD after one year in water.                                                                                                                                                                |
|                                                                      |       | 21   | Reproducible adsorption/desorption behavior after 3x vapor isotherm cycles.                                                                                                                               |
|                                                                      |       | 22   | Little change in water adsorption behavior after 2,000 adsorption/desorption cycles.                                                                                                                      |
| MONT1                                                                | Med.  | 23   | PXRD and SEM unchanged after 15 days in boiling water.                                                                                                                                                    |
| Pb <sub>2</sub> (PTPTP) <sub>2</sub> (H <sub>2</sub> O) <sub>2</sub> | Med.  | 24   | No change in unit cell parameters obtained from single crystal XRD after stirring in water, acid, and base solutions for 36 hours.                                                                        |
| Pb <sub>2</sub> (p-PDA)(PTPTP) <sub>2</sub>                          | Med.  | 24   | No change in unit cell parameters obtained from single crystal XRD after stirring in water, acid, and base solutions for 36 hours.                                                                        |

Table S4: Summary of characterization results used in classifying thermodynamically stable MOFs (continued).

| MOF                                                                        | Conf. | Ref. | Characterization summary                                                                                                                                                                                                                                                                                                                                           |
|----------------------------------------------------------------------------|-------|------|--------------------------------------------------------------------------------------------------------------------------------------------------------------------------------------------------------------------------------------------------------------------------------------------------------------------------------------------------------------------|
| Pb <sub>4</sub> (o-PDA) <sub>2</sub><br>(PTPTP) <sub>2</sub>               | Med.  | 24   | No change in unit cell parameters obtained from single crystal XRD after stirring in water, acid, and base solutions for 36 hours.                                                                                                                                                                                                                                 |
| LaBTB                                                                      | Low   | 25   | No change in PXRD after exposure to 60°C and 100°C aqueous HCl of pH 2, aqueous NaOH of pH 14, and water solutions for three days.                                                                                                                                                                                                                                 |
| H <sub>3</sub> (Cu <sub>4</sub> Cl) <sub>3</sub> -<br>(BTTRI) <sub>8</sub> | Low   | 26   | No change in PXRD or TGA results after three days in boiling water or 1 day in pH 3 acid.                                                                                                                                                                                                                                                                          |
| Zn(1,4-BDP)                                                                | Low   | 27   | No change in PXRD after three days in boiling water.                                                                                                                                                                                                                                                                                                               |
| Zn(1,3-BDP)                                                                | Low   | 27   | No change in PXRD after three days in boiling water.                                                                                                                                                                                                                                                                                                               |
| Cu <sub>3</sub> (BTP) <sub>2</sub>                                         | Low   | 13   | No change in PXRD after one day in boiling water or one day in pH 14 solution;                                                                                                                                                                                                                                                                                     |
| Zn <sub>3</sub> (BTP) <sub>2</sub>                                         | Low   | 13   | No change in PXRD after one week in 100°C aqueous pH 3 HCl solution; loss of PXRD after one hour in room temperature pH 14 NaOH solution or one day in boiling water.                                                                                                                                                                                              |
| Cu <sub>2</sub> (TCMBT)<br>(BPP)(OH)                                       | Low   | 28   | No change in PXRD after two months in boiling water.                                                                                                                                                                                                                                                                                                               |
| NOTT-300                                                                   | Low   | 29   | No change in PXRD after exposing activated sample to air for one month or immersing in water methanol, ethanol, CHCl <sub>3</sub> , CH <sub>3</sub> CN, DMF, THF, benzene, or toluene for one week. Activated sample also yields no change in CO <sub>2</sub> uptake at 1bar after 3x exposure to 90-100°C water vapor for 1 hour followed by sample reactivation. |
| PCMOF-5                                                                    | Low   | 30   | Fresh sample boiled in water for 7 days with minor loss of PXRD and mass. Sample activation indicates a reversible loss of sample crystallinity.                                                                                                                                                                                                                   |
| SNU-80                                                                     | Low   | 31   | No change in PXRD after one week in liquid water. No change in PXRD or elemental analysis after adsorption/desorption at 298 K.                                                                                                                                                                                                                                    |

Table S5: Summary of characterization results used in classifying MOFs with high kinetic stability.

| MOF         | Conf. | Ref.         | Characterization summary                                                                                                                                                                                                                                                                        |
|-------------|-------|--------------|-------------------------------------------------------------------------------------------------------------------------------------------------------------------------------------------------------------------------------------------------------------------------------------------------|
| CALF-25     | High  | 32           | No change in PXRD or BET surface area after adsorption to 95% RH at 313 K. No change in PXRD or decrease in CO <sub>2</sub> uptake after exposure to 90% RH for one day at 353 K. Loss of PXRD peaks after 7 days in boiling water.                                                             |
| CAU-10      | High  | 33           | Little change in water uptake properties after five adsorption/desorption cycles at 298 K with a two hour activation at 298 K between each cycle.                                                                                                                                               |
| DUT-51(Hf)  | High  | 34           | Dried samples soaked in water for 12 hours with no significant loss of crystallinity but minor loss in BET surface area.                                                                                                                                                                        |
| DUT-51(Zr)  | High  | 34           | Dried samples soaked in water for 12 hours with no significant loss of crystallinity but minor loss in BET surface area.                                                                                                                                                                        |
| DUT-67(Zr)  | High  | 35<br>33     | No changes to PXRD after dried powder soaked in water for one day or concentrated HCl for three days. PXRD changes under basic conditions.<br>Little change in water uptake properties after five adsorption/desorption cycles at 298 K with a two hour activation at 298 K between each cycle. |
| FMOF-1      | High  | 36           | No water adsorption or structural changes evidenced from isotherm or IR results structural change after exposure to 100% RH air. No water adsorption or structural changes evidenced from single crystal XRD or IR results after soaking in water for several days.                             |
| MIL-100(Al) | High  | 37<br>12     | No change in PXRD after 40 hydrothermal isobar stability cycles.<br>No change in PXRD but slight decrease in BET surface area and water uptake capacity after 40 water isobar cycles between 40 and 140°C at 75% RH in helium.                                                                  |
| MIL-100(Fe) | High  | 4<br>6<br>37 | No change in PXRD after immersion in water at 323 K for one day.<br>No change in PXRD or BET surface area after soaking in boiling water for one week.<br>Slight decrease in water capacity after 40 water isobar cycles but no change in PXRD or decrease in subsequent BET surface area.      |



Table S6: Summary of characterization results used in classifying MOFs with high kinetic stability (continued).

| MOF                          | Conf. | Ref. | Characterization summary                                                                                                                                                                                 |
|------------------------------|-------|------|----------------------------------------------------------------------------------------------------------------------------------------------------------------------------------------------------------|
| MIL-100(Fe)                  | High  | 38   | No change in BET surface area or pore volume after 6x adsorption/desorption vapor isotherms.                                                                                                             |
|                              |       | 39   | Majority of BET surface area is lost but PXRD maintained after two days in liquid water.                                                                                                                 |
| MIL-101-NH <sub>2</sub> (Cr) | High  | 3    | Normal adsorption/desorption behavior from vapor isotherm.                                                                                                                                               |
|                              |       | 40   | No loss of PXRD and only minor loss of BET surface area and micropore volume after 40 adsorption and desorption cycles.                                                                                  |
| MIL-125-NH <sub>2</sub> (Ti) | High  | 41   | No change in PXRD after two days in water. Normal adsorption/desorption behavior from water vapor isotherm.                                                                                              |
|                              |       | 42   | No change in PXRD but slight decrease in BET surface area and pore volume after 40 water isobar cycles.                                                                                                  |
|                              |       | 43   | No change in FTIR after exposure to water vapor at 373 K.                                                                                                                                                |
| MIL-127                      | High  | 39   | No change in PXRD but minor reduction in BET surface area after two days in liquid water.                                                                                                                |
| MIL-53(Al)                   | High  | 2    | Change in PXRD in 50% steam at 225°C.                                                                                                                                                                    |
|                              |       | 44   | Some loss in PXRD intensity and 40% loss of BET surface area after six hours in water at 80°C                                                                                                            |
|                              |       | 45   | PXRD, SEM, TGA, and BET surface area measurements show stability in pH 2 and pH 7 aqueous solutions at 25°C, 50°C, 100°C after one week. Stable for two days in pH 14 solution at 25°C, 50°C, and 100°C. |
| MIL-53(Cr)                   | High  | 44   | No change in PXRD or BET surface area after six hours in basic 7E-2 M NaOH, acidic 7.2E-2 M HCl, and neutral water solutions.                                                                            |
| MOF-525                      | High  | 46   | No change in PXRD or BET surface area after activated structures immersed in methanol, water and water:acetic acid (50:50 by vol.) for one day.                                                          |
| MOF-545                      | High  | 46   | No change in PXRD or BET surface area after activated structures immersed in methanol, water and water:acetic acid (50:50 by vol.) for one day.                                                          |
| MOF-801-P                    | High  | 33   | Little change in water uptake properties after five adsorption/desorption cycles at 298 K with a two hour activation at 298 K between each cycle.                                                        |

Table S7: Summary of characterization results used in classifying MOFs with high kinetic stability (continued).

| MOF                                                                               | Conf. | Ref. | Characterization summary                                                                                                                                                                |
|-----------------------------------------------------------------------------------|-------|------|-----------------------------------------------------------------------------------------------------------------------------------------------------------------------------------------|
| MOF-801-SC                                                                        | High  | 33   | Little change in water uptake properties after five adsorption/desorption cycles at 298 K with a two hour activation at 298 K between each cycle.                                       |
| MOF-802                                                                           | High  | 33   | Little change in water uptake properties after five adsorption/desorption cycles at 298 K with a two hour activation at 298 K between each cycle.                                       |
| MOF-804                                                                           | High  | 33   | Little change in water uptake properties after five adsorption/desorption cycles at 298 K with a two hour activation at 298 K between each cycle.                                       |
| MOF-841                                                                           | High  | 33   | Little change in water uptake properties after five adsorption/desorption cycles at 298 K with a two hour activation at 298 K between each cycle.                                       |
| $\text{Ni}_8(\text{OH})_4(\text{H}_2\text{O})_2(\text{L}_6)_6$                    | High  | 47   | No change in adsorption behavior or PXRD throughout 3x cyclic vapor adsorption measurements at 298 K.                                                                                   |
| $\text{Ni}_8(\text{OH})_4(\text{H}_2\text{O})_2(\text{L}_8)_6$                    | High  | 47   | No change in adsorption behavior or PXRD throughout 3x cyclic vapor adsorption measurements at 298 K.                                                                                   |
| $\text{Ni}_8(\text{OH})_4(\text{H}_2\text{O})_2(\text{L}_9)_6$                    | High  | 47   | No change in adsorption behavior or PXRD throughout 3x cyclic vapor adsorption measurements at 298 K.                                                                                   |
| $\text{Ni}_8(\text{OH})_4(\text{H}_2\text{O})_2(\text{L}_{10})_6$                 | High  | 47   | No change in adsorption behavior or PXRD throughout 3x cyclic vapor adsorption measurements at 298 K.                                                                                   |
| $\text{Ni}_8(\text{OH})_4(\text{H}_2\text{O})_2(\text{L}_{10}-\text{(CH}_3)_2)_6$ | High  | 47   | No change in adsorption behavior or PXRD throughout 3x cyclic vapor adsorption measurements at 298 K.                                                                                   |
| $\text{Ni}_8(\text{OH})_4(\text{H}_2\text{O})_2(\text{L}_{10}-\text{(CF}_3)_2)_6$ | High  | 47   | No change in adsorption behavior or PXRD throughout 3x cyclic vapor adsorption measurements at 298 K.                                                                                   |
| $\text{Zn}_2(\text{BTC})(\text{OH})-(\text{H}_2\text{O})$                         | High  | 48   | No change in PXRD after immersion in boiling water for 18 hours. No change in PXRD after 40 isobar cycles from 40°C to 140°C though slight loss of water sorption capacity is observed. |
| $\text{Zn}(\text{L}_{14})(\text{L}_{15})$                                         | High  | 49   | No change in PXRD or vapor adsorption behavior throughout four isotherms of water adsorption and desorption.                                                                            |

Table S8: Summary of characterization results used in classifying MOFs with high kinetic stability (continued).

| MOF        | Conf. | Ref. | Characterization summary                                                                                                                                                                                                                                                                                         |
|------------|-------|------|------------------------------------------------------------------------------------------------------------------------------------------------------------------------------------------------------------------------------------------------------------------------------------------------------------------|
| Ni-NIC     | High  | 50   | Activated sample exposed to air with 80% RH for three days at room temperature causing an increase in loading and selectivity for CO <sub>2</sub> and N <sub>2</sub> but no change in PXRD. No change in PXRD or adsorption capacities after two days in room temperature water.                                 |
| NU-1000    | High  | 51   | No change in PXRD or BET surface area after one day in liquid water.                                                                                                                                                                                                                                             |
| PCN-225(M) | High  | 52   | PXRD indicates slight increase in amorphous character, and there is some reduction in BET surface area after soaking in pH 0 to pH 12 aqueous solutions for 12 hours.                                                                                                                                            |
| SCUTC-18   | High  | 53   | No BET surface area loss or change in PXRD after 30 days in humid air.                                                                                                                                                                                                                                           |
|            |       | 54   | No change in PXRD after exposure to 40°C water vapor for two weeks.                                                                                                                                                                                                                                              |
| UiO-66     | High  | 55   | No loss in BET surface area or change in PXRD after adsorption isotherm in air at 298 K.                                                                                                                                                                                                                         |
|            |       | 38   | Reproducible isotherm over 6x adsorption/desorption isotherms.                                                                                                                                                                                                                                                   |
|            |       | 56   | No change in PXRD after 15 hours in boiling water.                                                                                                                                                                                                                                                               |
|            |       | 57   | No change in PXRD after stirring activated sample in water, acetone, benzene and DMF solutions for one day.                                                                                                                                                                                                      |
|            |       | 58   | No change in PXRD after one day in 25°C water.                                                                                                                                                                                                                                                                   |
|            |       | 33   | Little change in water uptake properties after five adsorption/desorption cycles at 298 K with a two hour activation at 298 K between each cycle.                                                                                                                                                                |
|            |       | 59   | No loss of BET surface area after vapor adsorption. No change in PXRD after one day exposure to water, methanol, isopropanol, acetone, pyridine, chloroform, and 0.1 M HCl. Loss of crystallinity after one day in 0.1 M NaOH. FTIR indicates no change in structure except after NaOH and HCl aqueous exposure. |
|            |       | 39   | Majority of BET surface area lost after two days in water. No major changes in PXRD.                                                                                                                                                                                                                             |
| UiO-66-MM  | High  | 60   | No change in PXRD or loss of BET surface area after vapor adsorption/desorption in air at 298 K.                                                                                                                                                                                                                 |

Table S9: Summary of characterization results used in classifying MOFs with high kinetic stability (continued).

| MOF                    | Conf. | Ref. | Characterization summary                                                                                                                                                                                                                                                                             |
|------------------------|-------|------|------------------------------------------------------------------------------------------------------------------------------------------------------------------------------------------------------------------------------------------------------------------------------------------------------|
| UiO-66-NH <sub>2</sub> | High  | 55   | No change in PXRD or loss in BET surface area after adsorption/desorption in air at 298 K.                                                                                                                                                                                                           |
|                        |       | 61   | No change in PXRD after vapor exposure and subsequent reactivation.                                                                                                                                                                                                                                  |
|                        |       | 59   | No loss of BET surface area after vapor adsorption isotherm. No change in PXRD after one day exposure to water, methanol, isopropanol, acetone, pyridine, chloroform, and 0.1 M HCl. Loss of crystallinity after one day in 0.1 M NaOH. FTIR only indicates change in structure after NaOH exposure. |
|                        |       | 62   | No change in PXRD after exposure to water or 1 M HCl for 2 hours at room temperature. Loss of PXRD after exposure to 1 M basic solution.                                                                                                                                                             |
|                        |       | 42   | No change in PXRD but some loss in BET surface area and pore volume after 40 isobar cycles.                                                                                                                                                                                                          |
|                        |       | 39   | Large loss in BET surface area but no major changes to PXRD after two days in water.                                                                                                                                                                                                                 |
| Zn-DMOF-A              | High  | 63   | No change in PXRD or loss of BET surface area after vapor adsorption/desorption in air at 298 K.                                                                                                                                                                                                     |
| Zn-DMOF-TM             | High  | 63   | No change in PXRD or loss of BET surface area after vapor adsorption/desorption in air at 298 K.                                                                                                                                                                                                     |
|                        |       | 64   | No change in PXRD or loss of BET surface area after 3x vapor adsorption/desorption in air at 298 K or exposure to ambient air for three months.                                                                                                                                                      |
| Zn-MOF-508             | High  | 65   | No change in PXRD or loss of BET surface area after vapor adsorption/desorption in air at 298 K.                                                                                                                                                                                                     |
| ZnPO <sub>3</sub>      | High  | 50   | Reduction in PXRD peak intensities but negligible change in capacity and selectivity for CO <sub>2</sub> and N <sub>2</sub> after activated sample exposed to air with 80% RH for 3 days at room temperature.                                                                                        |

Table S10: Summary of characterization results used in classifying MOFs with high kinetic stability (continued).

| MOF                     | Conf. | Ref. | Characterization summary                                                                                                                                                              |
|-------------------------|-------|------|---------------------------------------------------------------------------------------------------------------------------------------------------------------------------------------|
| CAU-10-CH <sub>3</sub>  | Med.  | 66   | No change in PXRD or FTIR after soaking in aqueous solutions of pH 2 - 8 for 18 hours or exposure to water at 130°C for three hours.                                                  |
| CAU-10-H                | Med.  | 66   | No change in PXRD or FTIR after soaking in aqueous solutions of pH 2 - 8 for 18 hours or exposure to water at 130°C for three hours.                                                  |
| CAU-10-NH <sub>2</sub>  | Med.  | 66   | No change in PXRD or FTIR after soaking in aqueous solutions of pH 2 - 8 for 18 hours or exposure to water at 130°C for three hours.                                                  |
| CAU-10-NO <sub>2</sub>  | Med.  | 66   | No change in PXRD or FTIR after soaking in aqueous solutions of pH 2 - 8 for 18 hours or exposure to water at 130°C for three hours.                                                  |
| CAU-10-OCH <sub>3</sub> | Med.  | 66   | No change in PXRD or FTIR after soaking in aqueous solutions of pH 2 - 8 for 18 hours or exposure to water at 130°C for three hours.                                                  |
| CAU-10-OH               | Med.  | 66   | No change in PXRD or FTIR after soaking in aqueous solutions of pH 2 - 8 for 18 hours or exposure to water at 130°C for three hours.                                                  |
| CdZrSr                  | Med.  | 50   | Reduction in PXRD intensity but no change in capacity and selectivity for CO <sub>2</sub> and N <sub>2</sub> after activated sample exposed to 80% RH for 3 days at room temperature. |
| Co-NIC                  | Med.  | 18   | No decrease in CO <sub>2</sub> or N <sub>2</sub> capacity and selectivity after as-synthesized material exposed to air at 68% RH and 26°C for three days.                             |
| Cu-PCN                  | Med.  | 18   | No decrease in CO <sub>2</sub> or N <sub>2</sub> capacity and selectivity after as-synthesized material exposed to air at 68% RH and 26°C for three days.                             |
| Eu-Cu                   | Med.  | 50   | No change in capacity and selectivity for CO <sub>2</sub> and N <sub>2</sub> after activated sample exposed to 80% RH for 3 days at room temperature.                                 |
| La-Cu                   | Med.  | 50   | No change in capacity and selectivity for CO <sub>2</sub> and N <sub>2</sub> after activated sample exposed to 80% RH for 3 days at room temperature.                                 |
| MIL-53-F(Al)            | Med.  | 67   | No change in PXRD or n-hexane adsorption capacity after water vapor adsorption isotherm measurement.                                                                                  |
| Al(OH)(1,4-NDC)         | Med.  | 68   | Normal vapor adsorption/desorption at 298K.                                                                                                                                           |

Table S11: Summary of characterization results used in classifying MOFs with high kinetic stability (continued).

| MOF        | Conf. | Ref. | Characterization summary                                                                                                                                                                                                                                                                            |
|------------|-------|------|-----------------------------------------------------------------------------------------------------------------------------------------------------------------------------------------------------------------------------------------------------------------------------------------------------|
| Ni-HF      | Med.  | 18   | No decrease in CO <sub>2</sub> or N <sub>2</sub> capacity and selectivity after as-synthesized material exposed to air at 68% RH and 26°C for three days.                                                                                                                                           |
| UiO-66-Br  | Med.  | 62   | No change in PXRD after exposure to water or 1 M HCl for 2 hours at room temperature. Loss of PXRD after exposure to 1 M base.                                                                                                                                                                      |
|            |       | 39   | No significant changes in PXRD but large reduction BET surface area after two days in water.                                                                                                                                                                                                        |
| UiO-67     | Med.  | 51   | No change in PXRD or BET surface area after one day in liquid water.                                                                                                                                                                                                                                |
|            |       | 58   | No change in PXRD after one day in 25°C water.                                                                                                                                                                                                                                                      |
|            |       | 59   | Loss of BET surface area after vapor adsorption. Some change in PXRD after one day in water but no change after methanol, isopropanol, acetone, pyridine, or chloroform. Loss of PXRD after one day in 0.1 M NaOH and 0.1 M HCl. FTIR indicates change in structure only for NaOH and HCl exposure. |
|            |       | 56   | Loss of PXRD after 15 hours in boiling water.                                                                                                                                                                                                                                                       |
| UTSA-16    | Med.  | 69   | No change in CO <sub>2</sub> uptake after exposure to air for three days before running 4x CO <sub>2</sub> adsorption isotherms at 296 K.                                                                                                                                                           |
| ZIF-7      | Med.  | 18   | No decrease in CO <sub>2</sub> or N <sub>2</sub> capacity and selectivity after as-synthesized material exposed to air at 68% RH and 26°C for three days.                                                                                                                                           |
| ZIF-90     | Med.  | 18   | No decrease in CO <sub>2</sub> or N <sub>2</sub> capacity and selectivity after as-synthesized material exposed to air at 68% RH and 26°C for three days.                                                                                                                                           |
| Zn-TTC     | Med.  | 18   | No decrease in CO <sub>2</sub> or N <sub>2</sub> capacity and selectivity after as-synthesized material exposed to air at 68% RH and 26°C for three days.                                                                                                                                           |
| Zn/Co-BTEC | Med.  | 18   | No decrease in CO <sub>2</sub> or N <sub>2</sub> capacity and selectivity after as-synthesized material exposed to air at 68% RH and 26°C for three days.                                                                                                                                           |
| Zr-DMBDC   | Med.  | 70   | No change in XRD or FTIR after soaking in aqueous HgCl <sub>2</sub> solution for 12 hours or exposure to Hg(0) vapor.                                                                                                                                                                               |
| AlaZnCl    | Low   | 71   | No change in PXRD after six month exposure to 98% RH at room temperature.                                                                                                                                                                                                                           |
| AlaZnOAc   | Low   | 71   | No change in PXRD after six month exposure to 98% RH at room temperature.                                                                                                                                                                                                                           |

Table S12: Summary of characterization results used in classifying MOFs with high kinetic stability (continued).

| MOF                                                                         | Conf. | Ref. | Characterization summary                                                                                                                                                 |
|-----------------------------------------------------------------------------|-------|------|--------------------------------------------------------------------------------------------------------------------------------------------------------------------------|
| Bio-MOF-13                                                                  | Low   | 1    | Minor loss in PXRD after being shaken vigorously in 10 mL of water for one hour.                                                                                         |
| CUK-1                                                                       | Low   | 72   | Sample did not need to be changed after long exposures to humid air.                                                                                                     |
| DUT-67(Hf)                                                                  | Low   | 35   | No changes to PXRD after dried powder soaked in water for one day or concentrated HCl for three days. PXRD changes under basic conditions.                               |
| DUT-68(Hf)                                                                  | Low   | 35   | No changes to PXRD after dried powder soaked in water for one day or concentrated HCl for three days. PXRD changes under basic conditions.                               |
| DUT-68(Zr)                                                                  | Low   | 35   | No changes to PXRD after dried powder soaked in water for one day or concentrated HCl for three days. PXRD changes under basic conditions.                               |
| DUT-69(Zr)                                                                  | Low   | 35   | No changes to PXRD after dried powder soaked in water for one day or concentrated HCl for three days. PXRD changes under basic conditions.                               |
| MIL-140 A                                                                   | Low   | 56   | No change in PXRD after 15 hours in boiling water.                                                                                                                       |
| MIL-140 B                                                                   | Low   | 56   | No change in PXRD after 15 hours in boiling water.                                                                                                                       |
| MIL-140 C                                                                   | Low   | 56   | No change in PXRD after 15 hours in boiling water.                                                                                                                       |
| MIL-140 D                                                                   | Low   | 56   | Minor changes in PXRD after 15 hours in boiling water.                                                                                                                   |
| MOFF-2                                                                      | Low   | 73   | No change in PXRD after water contact angle measurements                                                                                                                 |
| MOFOUR-1-Ni                                                                 | Low   | 74   | No change in PXRD after one month in air. Some change in PXRD after one month in water. New PXRD peaks after one day in boiling water.                                   |
| Zn <sub>6</sub> (IDC) <sub>4</sub> (OH) <sub>2</sub><br>(HPRZ) <sub>2</sub> | Low   | 75   | No change in PXRD after soaking in ethanol, acetone, tetrahydrofuran, benzene, toluene, and xylene for one day. Partial loss of PXRD intensities after soaking in water. |
| Cd(2,6-NDC) <sub>0.5</sub><br>(PCA)                                         | Low   | 76   | No change in PXRD after exposure to 60°C water vapor for one day or open air for months.                                                                                 |
| Zn <sub>2</sub> (2,6-NDC) <sub>2</sub><br>(2,2'-dimethyl-BPY)               | Low   | 54   | No change in PXRD after exposure to 40°C water vapor for one week.                                                                                                       |
| Cd(L <sub>1</sub> )(Cl)(H <sub>2</sub> O)                                   | Low   | 77   | Normal adsorption/desorption behavior in vapor isotherm.                                                                                                                 |



Table S13: Summary of characterization results used in classifying MOFs with high kinetic stability (continued).

| MOF                                                                          | Conf. | Ref. | Characterization summary                                                                                                                                         |
|------------------------------------------------------------------------------|-------|------|------------------------------------------------------------------------------------------------------------------------------------------------------------------|
| $\text{Cd}(\text{L}_2)(\text{Cl})(\text{H}_2\text{O})$                       | Low   | 77   | Normal adsorption/desorption behavior in vapor isotherm.                                                                                                         |
| $\text{Cd}_2(\text{L}_2)_2(\text{Br})_2(\text{H}_2\text{O})_3$               | Low   | 77   | Normal adsorption/desorption behavior in vapor isotherm.                                                                                                         |
| $\text{Cd}(\text{L}_3)(\text{Cl})(\text{H}_2\text{O})_2$                     | Low   | 77   | Normal adsorption/desorption behavior in vapor isotherm.                                                                                                         |
| $\text{Zn}_2\text{L}_4$                                                      | Low   | 78   | Normal adsorption/desorption behavior in vapor isotherms at 15°C, 25°C, 35°C, and 45°C.                                                                          |
| $\text{Ni}(\text{HPTZ})_2$                                                   | Low   | 79   | Minor changes to PXRD after as-synthesized sample exposed to boiling water, toluene, and ethanol for one week. Minor changes to PXRD after one day in 0.1 M HCl. |
| $\text{Zn}_4\text{O}(\text{BFBPDC})_3(\text{BPY})_{0.5}(\text{H}_2\text{O})$ | Low   | 80   | No change in PXRD after four days in humid conditions                                                                                                            |
| $\text{Ni}(\text{L}_{13})_2$                                                 | Low   | 81   | No change in PXRD after water vapor adsorption isotherm.                                                                                                         |
| $\text{Co}(\text{L}_{13})_2$                                                 | Low   | 81   | No change in PXRD after water vapor adsorption isotherm.                                                                                                         |
| $\text{Ni}_2(\text{C}_2\text{O}_4)(\text{L}_{16})_2$                         | Low   | 82   | Minor changes in PXRD after immersion in room temperature water for one day or 18 hours in 85°C water.                                                           |
| $\text{Zn}_3(\text{BPDC})_3(2,2'\text{-dimethyl-BPY})$                       | Low   | 83   | No change in PXRD after exposure to water vapor for ten days.                                                                                                    |
| NU-1000-SALI-1                                                               | Low   | 84   | No change in PXRD after water vapor isotherm.                                                                                                                    |
| NU-1000-SALI-3                                                               | Low   | 84   | No change in PXRD after water vapor isotherm.                                                                                                                    |
| NU-1000-SALI-7                                                               | Low   | 84   | No change in PXRD after water vapor isotherm.                                                                                                                    |
| NU-1000-SALI-9                                                               | Low   | 84   | No change in PXRD after water vapor isotherm.                                                                                                                    |
| PCN-56                                                                       | Low   | 85   | Little change in PXRD after pH 2 HCl for two days and pH 11 NaOH for one day.                                                                                    |
| PCN-57                                                                       | Low   | 85   | Little change in PXRD after pH 2 HCl for 4.5 days or pH 2 HCl for one week.                                                                                      |
| PCN-58                                                                       | Low   | 85   | Little change in PXRD after pH 2 HCl or water for one day or pH 11 NaOH for 15 hours.                                                                            |
| SIFSIX-2-Cu-i                                                                | Low   | 86   | No change in PXRD after exposure to 5% - 95% RH under a nitrogen atmosphere.                                                                                     |
| Tb-FTZB-MOF                                                                  | Low   | 87   | No change in PXRD after soaking in water for one day or performing a water vapor isotherm.                                                                       |
| UiO-1,4-NDC                                                                  | Low   | 61   | No change in PXRD after exposure to 90% RH and subsequent reactivation.                                                                                          |



Table S14: Summary of characterization results used in classifying MOFs with high kinetic stability (continued).

| MOF                                     | Conf. | Ref. | Characterization summary                                                                                                                                                  |
|-----------------------------------------|-------|------|---------------------------------------------------------------------------------------------------------------------------------------------------------------------------|
| UiO-2,6-NDC                             | Low   | 56   | Some additional peaks in PXRD after 15 hours in boiling water.                                                                                                            |
|                                         |       | 88   | No change in PXRD after two hours in 0.1 M NaOH or HCl, one day in H <sub>2</sub> S or water, or one week in MeOH, CHCl <sub>3</sub> , IPA, or Ter-But-OH                 |
| UiO-66-(CO <sub>2</sub> H) <sub>2</sub> | Low   | 89   | No change in PXRD after stirring in water, acetic acid, or 1 M HCl for 12 hours. Complete loss of PXRD after 12 hours in 1 M NaOH.                                        |
| UiO-66-(OMe) <sub>2</sub>               | Low   | 61   | No change to PXRD after vapor exposure and subsequent reactivation                                                                                                        |
| UiO-66-Br <sub>2</sub>                  | Low   | 89   | No change in PXRD after being stirred in water, acetic acid, or 1 M HCl for 12 hours. Complete loss of PXRD after 12 hours in 1 M NaOH.                                   |
| UiO-66-CF <sub>3</sub>                  | Low   | 89   | No change in PXRD after being stirred in water, acetic acid, or 1 M HCl for 12 hours. Complete loss of PXRD after 12 hours in 1 M NaOH.                                   |
| UiO-66-Cl <sub>2</sub>                  | Low   | 89   | No change in PXRD after being stirred in water, acetic acid, or 1 M HCl for 12 hours. Complete loss of PXRD after 12 hours in 1 M NaOH.                                   |
| UiO-66-CO <sub>2</sub> H                | Low   | 90   | No change in PXRD after being stirred in water, acetic acid, or 1 M HCl for 12 hours. Complete loss of PXRD after 12 hours in 1 M NaOH.                                   |
| UiO-66-DM                               | Low   | 91   | No change in PXRD or BET surface area after vapor adsorption. No change in PXRD after exposure to water or 1 N HCl solutions. Complete loss of PXRD in 1 N NaOH solution. |
| UiO-66-I                                | Low   | 90   | No change in PXRD after stirring in water, acetic acid, or 1 M HCl for 12 hours. Complete loss of PXRD after 12 hours in 1 M NaOH.                                        |
| UiO-66-NO <sub>2</sub>                  | Low   | 61   | No change in PXRD after vapor exposure and subsequent reactivation.                                                                                                       |
|                                         |       | 62   | No change in PXRD after exposure to water or 1 M HCl for 2 hours at room temperature. Loss of PXRD after exposure to 1 M base.                                            |
| UiO-66-SO <sub>3</sub> H                | Low   | 90   | No change in PXRD after being stirred in water, acetic acid, or 1 M HCl for 12 hours. Complete loss of PXRD after 12 hours in 1 M NaOH.                                   |

Table S15: Summary of characterization results used in classifying MOFs with high kinetic stability (continued).

| MOF                                     | Conf. | Ref. | Characterization summary                                                                                            |
|-----------------------------------------|-------|------|---------------------------------------------------------------------------------------------------------------------|
| UMCM-150                                | Low   | 17   | No change in PXRD after placing sample in solutions of various water:dmf ratios.                                    |
| ValZnCl                                 | Low   | 71   | No change in PXRD after six month exposure to 98% RH at room temperature.                                           |
| ValZnFor                                | Low   | 71   | No change in PXRD after six month exposure to 98% RH at room temperature.                                           |
| Y-FTZB-MOF                              | Low   | 87   | No change in PXRD after soaking sample in water for one day or performing a water vapor isotherm.                   |
| ZIF-11                                  | Low   | 16   | No change in PXRD after one week in 80°C benzene or 65°C methanol. New PXRD peaks after three days in boiling water |
| Zn-DMOF-(NO <sub>2</sub> ) <sub>2</sub> | Low   | 92   | No change in PXRD after vapor adsorption isotherm.                                                                  |
| Zn(NDI-H)                               | Low   | 93   | No significant changes to PXRD after immersing as-synthesized sample in water for one day.                          |
| Zr-fum                                  | Low   | 94   | No change in PXRD after stirring in water, physiological NaCl solution, or phosphate buffered saline solution.      |

Table S16: Summary of characterization results used in classifying MOFs with low kinetic stability.

| MOF                                  | Conf. | Ref. | Characterization summary                                                                                                                                                                                                                                                                    |
|--------------------------------------|-------|------|---------------------------------------------------------------------------------------------------------------------------------------------------------------------------------------------------------------------------------------------------------------------------------------------|
| CAU-6                                | High  | 33   | Drop in water uptake properties after five adsorption/desorption cycles at 298 K with a two hour activation at 298 K between each cycle.                                                                                                                                                    |
| Co-MOF-74/<br>Co-CPO-27/<br>Co-DOBDC | High  | 95   | 85% of initial CO <sub>2</sub> uptake maintained and minor changes to PXRD after exposure to 70% RH at room temperature with subsequent regeneration.                                                                                                                                       |
|                                      |       | 96   | Change in PXRD and propane adsorption behavior after exposure to humidity.                                                                                                                                                                                                                  |
|                                      |       | 33   | Drop in water uptake properties after five adsorption/desorption cycles at 298 K with a two hour activation at 298 K between each cycle.                                                                                                                                                    |
| Cu-BTC/HKUST-1                       | High  | 2    | No change in PXRD but minor loss of BET surface area after exposure to 50 mol% steam at 200°C.                                                                                                                                                                                              |
|                                      |       | 17   | No change in PXRD after placing activated sample water for five hours. Additional PXRD peaks after one day.                                                                                                                                                                                 |
|                                      |       | 21   | Incremental drop in capacity throughout 5x vapor adsorption isotherms.                                                                                                                                                                                                                      |
|                                      |       | 55   | No change in PXRD but some loss in BET surface area after vapor adsorption isotherm at 298 K.                                                                                                                                                                                               |
|                                      |       | 38   | Incremental drop in capacity throughout 6x vapor adsorption isotherms.                                                                                                                                                                                                                      |
|                                      |       | 4    | Loss of PXRD after immersion in water at 323 K for one day. Large loss in BET surface area after water vapor adsorption isotherm at 298 K.                                                                                                                                                  |
|                                      |       | 97   | 15% drop in adsorption uptake after each of four vapor adsorption/desorption cycles at 36°C.                                                                                                                                                                                                |
| Mg-MOF-74/Mg-CPO-27/Mg-DOBDC         | High  | 98   | No change in PXRD but significant loss of BET surface area and low pressure CO <sub>2</sub> capacity loss after two hours in 15 mol% steam conditions at 100°C. 22.8% loss in low pressure CO <sub>2</sub> capacity and some loss of BET surface area after one year in a sealed container. |
|                                      |       | 95   | Minor changes in PXRD and 16% of initial CO <sub>2</sub> uptake maintained after exposure to 70% RH at room temperature with subsequent regeneration.                                                                                                                                       |
|                                      |       | 55   | No change in PXRD but 83% loss of BET surface area after vapor adsorption isotherm in air at 298 K.                                                                                                                                                                                         |

Table S17: Summary of characterization results used in classifying MOFs with low kinetic stability (continued).

| MOF                                                                                              | Conf. | Ref. | Characterization summary                                                                                                                                                        |
|--------------------------------------------------------------------------------------------------|-------|------|---------------------------------------------------------------------------------------------------------------------------------------------------------------------------------|
| Mg-MOF-74/Mg-CPO-27/Mg-DOBDC                                                                     | High  | 99   | Drop in CO <sub>2</sub> elution time and capacity after 15 CO <sub>2</sub> breakthrough cycles at 313 K with 16.3% RH.                                                          |
|                                                                                                  |       | 33   | Drop in water uptake properties after five adsorption/desorption cycles at 298 K with a two hour activation at 298 K between each cycle.                                        |
| MIL-101-NO <sub>2</sub> (Cr)                                                                     | High  | 3    | Normal adsorption/desorption after vapor isotherm.                                                                                                                              |
|                                                                                                  |       | 40   | No loss of PXRD but some loss of BET surface area and micropore volume after 40 adsorption/desorption cycles.                                                                   |
| MIL-47-F(V)                                                                                      | High  | 67   | Loss of PXRD and decreased n-hexane adsorption capacity after water vapor isotherm.                                                                                             |
| MIL-69(Al)/DUT-4                                                                                 | High  | 4    | Loss of PXRD after immersion in water at 323 K for one day. Desorption falls below the adsorption branch in water adsorption isotherm at 298 K.                                 |
| MOF-14                                                                                           | High  | 100  | Minor change in PXRD but significant loss of BET surface area after exposure to 90% RH air with subsequent reactivation.                                                        |
| MOF-805                                                                                          | High  | 33   | Drop in high pressure water uptake properties after five adsorption/desorption cycles at 298 K with a two hour activation at 298 K between each cycle.                          |
| MOF-806                                                                                          | High  | 33   | Drop in high pressure water uptake properties after five adsorption/desorption cycles at 298 K with a two hour activation at 298 K between each cycle.                          |
| MOF-808                                                                                          | High  | 33   | Drop in high pressure water uptake properties after five adsorption/desorption cycles at 298 K with a two hour activation at 298 K between each cycle.                          |
| Ni <sub>8</sub> (OH) <sub>4</sub> (H <sub>2</sub> O) <sub>2</sub> (L <sub>7</sub> ) <sub>6</sub> | High  | 47   | Slight decrease in adsorption behavior after 3x cyclic vapor isotherm measurements at 298 K. No change in PXRD after vapor adsorption                                           |
| Ni-DMOF                                                                                          | High  | 101  | Normal adsorption/desorption behavior in isotherm until 30% RH at 298K. Additional PXRD peaks and desorption falls below adsorption branch for isotherm run to 60% RH at 298 K. |
|                                                                                                  |       | 102  | No bond breakage evidenced by IR or change in PXRD after exposure to 48% RH at 298 K.                                                                                           |

Table S18: Summary of characterization results used in classifying MOFs with low kinetic stability (continued).

| MOF                                  | Conf. | Ref. | Characterization summary                                                                                                                                                                                                                     |
|--------------------------------------|-------|------|----------------------------------------------------------------------------------------------------------------------------------------------------------------------------------------------------------------------------------------------|
| Ni-MOF-74/Ni-CPO-27/Ni-DOBDC         | High  | 98   | Significant loss of PXRD and BET surface area and some loss of low pressure CO <sub>2</sub> capacity after 2 hours in 5 mol% steam at 100°C conditions. No loss of low pressure CO <sub>2</sub> capacity after 1 year in a sealed container. |
|                                      |       | 95   | Minor changes to PXRD and 61% of initial CO <sub>2</sub> uptake maintained after exposure to 70% RH at room temperature with subsequent regeneration.                                                                                        |
|                                      |       | 33   | Drop in water uptake properties after five adsorption/desorption cycles at 298 K with a two hour activation at 298 K between each cycle.                                                                                                     |
| SCUTC-19                             | High  | 53   | Loss of PXRD intensity and large BET surface area loss after one week in humid air.                                                                                                                                                          |
| Zn-DMOF                              | High  | 101  | Normal adsorption/desorption behavior in water isotherm until 30% RH at 298 K. Additional PXRD peaks and desorption falls below adsorption branch for isotherm at 298 K to 60% RH                                                            |
|                                      |       | 55   | Change in PXRD and complete loss of BET surface area after water vapor isotherm at 298 K.                                                                                                                                                    |
|                                      |       | 102  | Bond breakage evidenced by IR and change in PXRD after exposure to 48% RH at 298 K.                                                                                                                                                          |
| Zn-DMOF-N                            | High  | 63   | No change in PXRD but some loss in BET surface area after vapor adsorption isotherm in air at 298 K.                                                                                                                                         |
| Zn-DMOF-TM <sub>0.5</sub>            | High  | 63   | No change in PXRD but some loss in BET surface area after vapor adsorption isotherm in air at 298 K.                                                                                                                                         |
| Zn-MOF-74/<br>Zn-CPO-27/<br>Zn-DOBDC | High  | 2    | Change in PXRD in 50% steam at 325°C                                                                                                                                                                                                         |
|                                      |       | 95   | Minor change in PXRD and some loss in initial CO <sub>2</sub> uptake after exposure to 70% RH at room temperature with subsequent reactivation.                                                                                              |

Table S19: Summary of characterization results used in classifying MOFs with low kinetic stability (continued).

| MOF                                                                                | Conf. | Ref.     | Characterization summary                                                                                                                                                                                                                                                                                                                                                                           |
|------------------------------------------------------------------------------------|-------|----------|----------------------------------------------------------------------------------------------------------------------------------------------------------------------------------------------------------------------------------------------------------------------------------------------------------------------------------------------------------------------------------------------------|
| Zn-NDC                                                                             | High  | 50<br>54 | Activated sample exposed to air with 80% RH for three days at room temperature causing no change in loading and selectivity for CO <sub>2</sub> and N <sub>2</sub> but reduced peak intensities in PXRD. Some change in PXRD and decrease in adsorption capacity for CO <sub>2</sub> after two days in room temperature water. Some change in PXRD after exposure to 40°C water vapor for one day. |
| Co-DMOF                                                                            | Med.  | 102      | Bond breakage and collapse of 3D structure evidenced by IR and PXRD measurements after exposure to 48% RH at 298 K.                                                                                                                                                                                                                                                                                |
| Cu-DMOF                                                                            | Med.  | 102      | Some bond breakage but no collapse of 3D structure evidenced by IR and PXRD measurements after exposure to 48% RH at 298 K.                                                                                                                                                                                                                                                                        |
| IRMOF-1-CF <sub>3</sub> O/<br>MOF-5-CF <sub>3</sub> O/<br>Banasorb-22              | Med.  | 103      | No change in PXRD but large loss of BET surface area after one week exposure to steam at 100°C                                                                                                                                                                                                                                                                                                     |
| Cu-EBTC                                                                            | Low   | 104      | Little change in PXRD after water vapor adsorption isotherm.                                                                                                                                                                                                                                                                                                                                       |
| Cu-HF                                                                              | Low   | 50       | Activated sample exposed to air with 80% RH for three days at room temperature causing a decrease in loading and selectivity for CO <sub>2</sub> and N <sub>2</sub> and a disappearance of peaks in PXRD. No change in PXRD and change in adsorption capacity for CO <sub>2</sub> after two days in room temperature water.                                                                        |
| Cu-MBTC                                                                            | Low   | 104      | Change in PXRD after water vapor adsorption isotherm.                                                                                                                                                                                                                                                                                                                                              |
| IRMOF-1-(CH <sub>3</sub> ) <sub>2</sub> /<br>MOF-5-(CH <sub>3</sub> ) <sub>2</sub> | Low   | 105      | No PXRD change after four days in ambient air.                                                                                                                                                                                                                                                                                                                                                     |
| IRMOF-1-CH <sub>3</sub> /<br>MOF-5-CH <sub>3</sub>                                 | Low   | 105      | No PXRD change after four days in ambient air.                                                                                                                                                                                                                                                                                                                                                     |
| IRMOF-3-AM15                                                                       | Low   | 106      | No change in PXRD after four days in air.                                                                                                                                                                                                                                                                                                                                                          |
| IRMOF-3/<br>MOF-5-NH <sub>2</sub>                                                  | Low   | 106      | Gradual decrease in PXRD intensity throughout four days of exposure to ambient air.                                                                                                                                                                                                                                                                                                                |
| MIL-110 (Al)                                                                       | Low   | 2<br>12  | Change in PXRD after 50% steam at 300°C.<br>Change in PXRD after 40 isobar cycles between 40 and 140°C at 75% RH in helium.                                                                                                                                                                                                                                                                        |
| MIL-125 (Ti)                                                                       | Low   | 41<br>43 | No change in FTIR after exposure to humid air at 373 K.<br>Loss of PXRD intensity and adsorption falls below adsorption branch in water vapor isotherm.                                                                                                                                                                                                                                            |

Table S20: Summary of characterization results used in classifying MOFs with low kinetic stability (continued).

| MOF                                                                  | Conf. | Ref.     | Characterization summary                                                                                                               |
|----------------------------------------------------------------------|-------|----------|----------------------------------------------------------------------------------------------------------------------------------------|
| MOFF-1                                                               | Low   | 73       | Slight changes in the PXRD pattern after water contact angle measurements .                                                            |
| MOFF-3                                                               | Low   | 73       | Slight changes in the PXRD pattern after water contact angle measurements.                                                             |
| Cu <sub>2</sub> (TPTC-O-(ethyl))                                     | Low   | 107      | Little change in PXRD after 1 hour exposure to 50% RH air but significant loss of PXRD after 16 days.                                  |
| Cu <sub>2</sub> (TPTC-O-(n-propyl))                                  | Low   | 107      | Little change in PXRD after 1 hour exposure to 50% RH air but significant loss of PXRD after 16 days.                                  |
| Cu <sub>2</sub> (TPTC-O-(n-hexyl))                                   | Low   | 107      | No change in PXRD after 16 days in 50% RH air.                                                                                         |
| SIFSIX-3-Zn                                                          | Low   | 86       | Irreversible change in PXRD after exposure to 5% to 95% RH under a nitrogen atmosphere.                                                |
| UiO-66-F <sub>2</sub>                                                | Low   | 89       | Loss of PXRD after being stirred in water, acetic acid, 1 M NaOH, and 1 M HCl for 12 hours.                                            |
| UiO-66-F                                                             | Low   | 89       | Change in PXRD after being stirred in water, acetic acid, 1 M NaOH, and 1 M HCl for 12 hours.                                          |
| Zr <sub>6</sub> O <sub>6</sub> (ABDC) <sub>12</sub>                  | Low   | 108      | Loss of PXRD after immersion in water for one day.                                                                                     |
| Zr <sub>6</sub> O <sub>6</sub> (ABDC-Cl <sub>2</sub> ) <sub>12</sub> | Low   | 56<br>58 | Significant loss of PXRD peaks after 15 hours in boiling water.<br>Some additional peaks in PXRD after one day immersion in 25°C water |

Table S21: Summary of characterization results used in classifying unstable MOFs.

| MOF                     | Conf. | Ref. | Characterization summary                                                                                                                                                                                                                                                                                        |
|-------------------------|-------|------|-----------------------------------------------------------------------------------------------------------------------------------------------------------------------------------------------------------------------------------------------------------------------------------------------------------------|
| IRMOF-1/MOF-5           | High  | 2    | New PXRD peaks and major loss of BET surface area after exposure to 10mol% water at 40°C.                                                                                                                                                                                                                       |
|                         |       | 17   | Change in PXRD after exposure to liquid water.                                                                                                                                                                                                                                                                  |
|                         |       | 103  | Complete of BET surface area after minutes and change in PXRD after 2 hours during steam exposure.                                                                                                                                                                                                              |
|                         |       | 106  | Immediate loss of PXRD after exposure to air.                                                                                                                                                                                                                                                                   |
|                         |       | 105  | Loss of PXRD and BET surface area as well as large changes to crystal morphology observed via SEM after one hour in liquid water.                                                                                                                                                                               |
|                         |       | 109  | New PXRD peaks after one day exposure to ambient air.                                                                                                                                                                                                                                                           |
| MOF-177                 | High  | 17   | Change in PXRD after exposure to liquid water.                                                                                                                                                                                                                                                                  |
|                         |       | 110  | Additional PXRD peaks after one day in 40%RH air. Complete loss of PXRD and BET surface area after three days in 40% RH air.                                                                                                                                                                                    |
|                         |       | 111  | Significant changes to PXRD after one week in 16% RH air. Complete loss of PXRD and BET surface area after 12 hours in liquid water at 25°C.                                                                                                                                                                    |
| MOF-508                 | High  | 53   | Loss of PXRD peaks after 10 hours in humid air.                                                                                                                                                                                                                                                                 |
|                         |       | 2    | Loss of PXRD with 5% steam at 100°C.                                                                                                                                                                                                                                                                            |
|                         |       | 54   | Some change in PXRD after exposure to 40°C water vapor for one day.                                                                                                                                                                                                                                             |
| MOF-69C                 | High  | 2    | Change in PXRD after 0% steam at ambient temperature.                                                                                                                                                                                                                                                           |
| Zn-DMOF-NO <sub>2</sub> | High  | 92   | Additional peaks in PXRD after water vapor isotherm until 60% RH at 298 K.                                                                                                                                                                                                                                      |
|                         |       | 63   | Change in PXRD and full loss of BET surface area after vapor isotherm in air at 298 K.                                                                                                                                                                                                                          |
| UiO-BPY                 | Med.  | 59   | Complete loss of BET surface area after vapor adsorption. Loss of PXRD after one day exposure to protic solvents (water, methanol, isopropanol) as well as HCl and NaOH but no change in PXRD in acetone, pyridine, or chloroform. FTIR also indicates no change in structure except for NaOH and HCl exposure. |
| UMCM-1                  | Med.  | 55   | Full loss of BET surface area and loss of peaks in PXRD after vapor adsorption isotherm in air at 298 K.                                                                                                                                                                                                        |



Table S22: Summary of characterization results used in classifying unstable MOFs (continued).

| MOF                             | Conf. | Ref. | Characterization summary                                                                                                                    |
|---------------------------------|-------|------|---------------------------------------------------------------------------------------------------------------------------------------------|
| Zn-DMOF-Br                      | Med.  | 63   | Full loss of BET surface area and change in PXRD after vapor adsorption isotherm in air at 298 K.                                           |
| Zn-DMOF-Cl <sub>2</sub>         | Med.  | 63   | Full loss of BET surface area and change in PXRD after vapor adsorption isotherm in air at 298 K.                                           |
| Zn-DMOF-DM                      | Med.  | 64   | Full loss of BET surface area and change in PXRD after vapor adsorption isotherm in air at 298 K.                                           |
| Zn-DMOF-DM <sub>0.5</sub>       | Med.  | 64   | Full loss of BET surface area and change in PXRD after vapor adsorption isotherm in air at 298 K.                                           |
| Zn-DMOF-MM                      | Med.  | 64   | Full loss of BET surface area and change in PXRD after vapor adsorption isotherm in air at 298 K.                                           |
| Zn-DMOF-MM <sub>0.5</sub>       | Med.  | 64   | Full loss of BET surface area and change in PXRD after vapor adsorption isotherm in air at 298 K.                                           |
| Zn-DMOF-NH <sub>2</sub>         | Med.  | 55   | Full loss of BET surface area and change in PXRD after vapor adsorption isotherm in air at 298 K.                                           |
| Zn-DMOF-OH                      | Med.  | 63   | Full loss of BET surface area and change in PXRD after vapor adsorption isotherm in air at 298 K.                                           |
| Zn-DMOF-TF                      | Med.  | 64   | Full loss of BET surface area and change in PXRD after vapor adsorption isotherm in air at 298 K.                                           |
| Zn-MOF-508-TM                   | Med.  | 65   | Full loss of BET surface area and change in PXRD after vapor adsorption isotherm in air at 298 K.                                           |
| Bio-MOF-11                      | Low   | 1    | Sample dissolves immediately in water and loses all PXRD peaks after being shaken vigorously in 10 mL water.                                |
| Bio-MOF-12                      | Low   | 1    | Sample partially dissolves immediately in water and loses all PXRD after being shaken vigorously in 10 mL water                             |
| MIL-47(V)                       | Low   | 44   | Full loss of PXRD and BET surface area after exposure for 6 hours in basic (7E-2M NaOH), acidic (7.2E-2 M HCl) and neutral water solutions. |
| MOF-505                         | Low   | 17   | Change in PXRD after exposure to liquid water.                                                                                              |
| Cu <sub>2</sub> (TPTC-O-methyl) | Low   | 107  | Change in PXRD peaks after exposure to 50% RH air for 1 hour                                                                                |

Table S23: Ligand definitions

| Abbreviation                                 | Chemical name                                                                               |
|----------------------------------------------|---------------------------------------------------------------------------------------------|
| ALA                                          | Alanine                                                                                     |
| ABDC                                         | 4,4'-azobenzenedicarboxylate                                                                |
| AC                                           | Acetate                                                                                     |
| AD                                           | Adenine                                                                                     |
| ADC                                          | Anthracenedicarboxylate                                                                     |
| BDC                                          | 1,4-benzenedicarboxylate                                                                    |
| BDP                                          | Benzenedi(4-pyrazolyl)                                                                      |
| BFBPDC                                       | 2,2'-bis-trifluoromethyl-biphenyl-4,4'-dicarboxylate                                        |
| BHTC                                         | Biphenyl-3,4',5-tricarboxylate                                                              |
| BPDC                                         | 4,4'-biphenyldicarboxylate                                                                  |
| BPE                                          | 1,2-bis(4-pyridyl)ethane                                                                    |
| BPP                                          | 1,3-bis(4-pyridyl)propane                                                                   |
| BPTC                                         | Biphenyl-3,3',5,5'-tetracarboxylate                                                         |
| BPY                                          | 4,4'-bipyridine                                                                             |
| BPZ                                          | 3,3',5,5'-tetramethyl-4,4'-bipyrazolate                                                     |
| BTC                                          | 1,3,5-benzenetricarboxylate                                                                 |
| BTP                                          | 1,3,5-tris(1H-pyrazol-4-yl)benzene                                                          |
| BTTRI                                        | 1,3,5-tris(1H-1,2,3-triazol-5-yl)benzene                                                    |
| C <sub>6</sub> H <sub>5</sub> O <sub>7</sub> | 2-hydroxypropane-1,2,3-tricarboxylate                                                       |
| C <sub>6</sub> H <sub>4</sub> O <sub>7</sub> | 2-oxidopropane-1,2,3-tricarboxylate                                                         |
| DABCO                                        | 4-diazabicyclo[2.2.2]-octane                                                                |
| DMBDC                                        | 2,5-dimercapto-1,4-benzenedicarboxylate                                                     |
| DOBDC                                        | 2,5-dihydroxyterephthalate                                                                  |
| DPA                                          | 4,4'-dipyridylacetylene                                                                     |
| DTTDC                                        | Dithieno[3,2-b;2',3'-d]-thiophene-2,6-dicarboxylate                                         |
| FOR                                          | Formate                                                                                     |
| FTZB                                         | 3-fluoro-4'-(2H-tetrazol-5-yl)biphenyl-4-carboxylate                                        |
| FUM                                          | Fumarate                                                                                    |
| H <sub>2</sub> L                             | Tetraethyl-1,3,6,8-pyrenetetraphosponate                                                    |
| H <sub>2</sub> PDA                           | Phenylenediacetate                                                                          |
| H <sub>2</sub> PTPTP                         | 2-(5-6-[5-(pyrazin-2-yl)-1H-1,2,4-triazol-3-yl]-pyridin-2-yl-1H-1,2,4-triazol-3-yl)pyrazine |
| H <sub>4</sub> L                             | Biphenyl-3,3',5,5'-tetracarboxylate                                                         |
| HPTZ                                         | 4-(1,2,4-triazol-4-yl)phenylphosphonate)                                                    |
| IDC                                          | Imidazole-4,5-dicarboxylate                                                                 |
| ISO                                          | Isophthalate                                                                                |

Table S24: Ligand definitions (continued)

| Abbreviation    | Chemical name                                                          |
|-----------------|------------------------------------------------------------------------|
| L <sub>1</sub>  | 2-((pyridin-4-yl)methylamino)-4-methylpentanoate                       |
| L <sub>2</sub>  | 2-(pyridin-4-yl)methylamino)-3-hydroxypropanoate                       |
| L <sub>3</sub>  | 2-((pyridin-4-yl)methylamino)-3-hydroxybutanoate                       |
| L <sub>4</sub>  | 4,4'-bipyridine-2,6,2',6'-tetracarboxylate                             |
| L <sub>5</sub>  | 1,2,4,5-tetrakisphosphonomethylbenzene                                 |
| L <sub>6</sub>  | 1H-pyrazole-4-carboxylate                                              |
| L <sub>7</sub>  | 4-(1H-pyrazole-4-yl)benzoate                                           |
| L <sub>8</sub>  | 4,4'-benzene-1,4-diylb- is(1H-pyrazole)                                |
| L <sub>9</sub>  | 4,4'-buta-1,3-diyne-1,4-diylbis(1H-pyrazole)                           |
| L <sub>10</sub> | 4,4'-(benzene-1,4-diyl-diethyne-2,1-diyl)bis(1H-pyrazole)              |
| L <sub>11</sub> | Perfluorinated biphenyl carboxylate                                    |
| L <sub>12</sub> | Perfluorinated biphenyl bistetrazole                                   |
| L <sub>13</sub> | 3,5-di(pyridine-4-yl) benzoate                                         |
| L <sub>14</sub> | 4,4'-(2,3,5,6-Tetramethoxy-1,4-phenylene)dipyridine                    |
| L <sub>15</sub> | 4,4',4'',4'''-dibromo-benzene-1,2,4,5-tetrayl-tetrabenzoate            |
| L <sub>16</sub> | 4,2',4'',2'''-terpyridine-4'-carboxylate                               |
| L <sub>17</sub> | 2-methylimidazolate-4-amide-5-imidate                                  |
| MEIM            | 2-methylimidazole                                                      |
| MTB             | 4,4',4'',4'''-Methanetetrayltetrabenzoic acid                          |
| NDC             | Napthalenedicarboxylate                                                |
| PCP             | P,P'-diphenylmethylenediphosphinate                                    |
| PDC             | Pyridine-2,4-dicarboxylate                                             |
| PHIM            | Phenyl benzimidazolate                                                 |
| PRZ             | Piperazine                                                             |
| PYR             | Pyrazine                                                               |
| PZDC            | 1H-pyrazole-3,5-dicarboxylic acid                                      |
| TAZB            | 3,3',5,5'-azobenzenetetracarboxylate                                   |
| TBAPY           | 1,3,6,8-tetrakis(p-benzoate)pyrene                                     |
| TCMBT           | N,N',N''-tris(carboxymethyl)-1,3,5-benzenetricarboxamide               |
| TCPP            | Meso-tetra(4-carboxyl-phenyl) porphyrin                                |
| TCPP(M)         | Tetrakis(4-carboxyphenyl)-porphyrin(M); M =Ni, Co or Fe                |
| TDC             | 2,5-thiophenedicarboxylate                                             |
| TEIA            | 1,3,5,7-tetrakis(4-(2-ethyl-1H-imidazol-1-yl)phenyl)-ane               |
| THIPC           | (S)-4,5,6,7-tetrahydro-1H-imidazo[4,5-c]pyridine-6-carboxylate         |
| TPTC-O          | 2',5'-dialkyloxy-[1,1':4',1''-terphenyl]-3,3'',5,5'''-tetracarboxylate |
| TZ              | 3,5-bis(trifluoromethyl)-1,2,4-triazolate                              |
| VAL             | Valine                                                                 |

## References

- (1) Li, T.; Chen, D.-L.; Sullivan, J. E.; Kozlowski, M. T.; Johnson, J. K.; Rosi, N. L. *Chem. Sci.* **2013**, *4*, 1746.
- (2) Low, J. J.; Benin, A. I.; Jakubczak, P.; Abrahamian, J. F.; Faheem, S. A.; Willis, R. R. *J. Am. Chem. Soc.* **2009**, *131*, 15834.
- (3) Akiyama, G.; Matsuda, R.; Sato, H.; Hori, A.; Takata, M.; Kitagawa, S. *Microporous Mesoporous Mater.* **2012**, *157*, 89.
- (4) Kussgens, P.; Rose, M.; Senkowska, I.; Froede, H.; Henschel, A.; Siegle, S.; Kaskel, S. *Microporous Mesoporous Mater.* **2009**, *120*, 325.
- (5) Hong, D.-Y.; Hwang, Y. K.; Serre, C.; Ferey, G.; Chang, J.-S. *Adv. Funct. Mater.* **2009**, *19*, 1537.
- (6) Seo, Y.-K.; Yoon, J. W.; Lee, J. S.; Hwang, Y. K.; Jun, C.-H.; Chang, J.-S.; Wuttke, S.; Bazin, P.; Vimont, A.; Daturi, M.; Bourrelly, S.; Llewellyn, P. L.; Horcajada, P.; Serre, C.; Ferey, G. *Adv. Mater.* **2012**, *24*, 806.
- (7) Ehrenmann, J.; Henninger, S. K.; Janiak, C. *Eur. J. Inorg. Chem.* **2011**, 471.
- (8) Hu, Y. L.; Song, C. Y.; Liao, J.; Huang, Z. L.; Li, G. K. *J. Chromatogr. A* **2013**, *1294*, 17.
- (9) Ferey, G.; Mellot-Draznieks, C.; Serre, C.; Millange, F.; Dutour, J.; Surble, S.; Margiolaki, I. *Science* **2005**, *309*, 2040.
- (10) Akiyama, G.; Matsuda, R.; Sato, H.; Takata, M.; Kitagawa, S. *Adv. Mater.* **2011**, *23*, 3294.
- (11) Sindoro, M.; Jee, A.-Y.; Granick, S. *Chem. Commun.* **2013**, *49*, 9576.

- (12) Celic, T. B.; Mazaj, M.; Mali, G.; Kaucic, V.; Logar, N. Z. *Proceedings of the 5th Serbian-Croatian-Slovenian Symposium on Zeolites* **2013**,
- (13) Colombo, V.; Galli, S.; Choi, H. J.; Han, G. D.; Maspero, A.; Palmisano, G.; Masciocchi, N.; Long, J. R. *Chem. Sci.* **2011**, *2*, 1311.
- (14) Feng, D.; Gu, Z.-Y.; Li, J.-R.; Jiang, H.-L.; Wei, Z.; Zhou, H.-C. *Angew. Chem. Int. Ed.* **2012**, *51*, 10307.
- (15) Feng, D.; Chung, W.-C.; Wei, Z.; Gu, Z.-Y.; Jiang, H.-L.; Chen, Y.-P.; Darensbourg, D. J.; Zhou, H.-C. *J. Am. Chem. Soc.* **2013**, *135*, 17105.
- (16) Park, K. S.; Ni, Z.; Cote, A. P.; Choi, J. Y.; Huang, R.; Uribe-Romo, F. J.; Chae, H. K.; O’Keeffe, M.; Yaghi, O. M. *Proc. Natl. Acad. Sci. U.S.A.* **2006**, *103*, 10186.
- (17) Cychosz, K. A.; Matzger, A. J. *Langmuir* **2010**, *26*, 17198.
- (18) Han, S.; Huang, Y.; Watanabe, T.; Dai, Y.; Walton, K. S.; Nair, S.; Sholl, D. S.; Meredith, J. C. *ACS Comb. Sci.* **2012**, *14*, 263.
- (19) Fateeva, A.; Chater, P. A.; Ireland, C. P.; Tahir, A. A.; Khimyak, Y. Z.; Wiper, P. V.; Darwent, J. R.; Rosseinsky, M. J. *Angew. Chem. Int. Ed.* **2012**, *51*, 7440.
- (20) Borjigin, T.; Sun, F.; Zhang, J.; Cai, K.; Ren, H.; Zhu, G. *Chem. Commun.* **2012**, *48*, 7613.
- (21) Pirngruber, G. D.; Hamon, L.; Bourrelly, S.; Llewellyn, P. L.; Lenoir, E.; Guillerm, V.; Serre, C.; Devic, T. *ChemSusChem* **2012**, *5*, 762.
- (22) Akiyama, G.; Matsuda, R.; Kitagawa, S. *Chem. Lett.* **2010**, *39*, 360.
- (23) Taddei, M.; Ienco, A.; Costantino, F.; Guerri, A. *RSC Adv.* **2013**, *3*, 26177.
- (24) Jia, Y.; Li, H.; Zhao, B.; Guo, Q.; Hou, H.; Fan, Y. *Eur. J. Inorg. Chem.* **2013**, *2013*, 438.

- (25) Duan, J.; Higuchi, M.; Horike, S.; Foo, M. L.; Rao, K. P.; Inubushi, Y.; Fukushima, T.; Kitagawa, S. *Adv. Funct. Mater.* **2013**, *23*, 3525.
- (26) Demessence, A.; D'Alessandro, D. M.; Foo, M. L.; Long, J. R. *J. Am. Chem. Soc.* **2009**, *131*, 8784.
- (27) Choi, H. J.; Dinca, M.; Dailly, A.; Long, J. R. *Energy Environ. Sci.* **2010**, *3*, 117.
- (28) Lu, Z.; Xing, H.; Sun, R.; Bai, J.; Zheng, B.; Li, Y. *Cryst. Growth Des.* **2012**, *12*, 1081.
- (29) Yang, S.; Sun, J.; Ramirez-Cuesta, A. J.; Callear, S. K.; David, W. I. F.; Anderson, D. P.; Newby, R.; Blake, A. J.; Parker, J. E.; Tang, C. C.; Schroeder, M. *Nat. Chem.* **2012**, *4*, 887.
- (30) Taylor, J. M.; Dawson, K. W.; Shimizu, G. K. H. *J. Am. Chem. Soc.* **2013**, *135*, 1193.
- (31) Xie, L.-H.; Suh, M. P. *Chem. Eur. J.* **2011**, *17*, 13653.
- (32) Taylor, J. M.; Vaidhyanathan, R.; Iremonger, S. S.; Shimizu, G. K. H. *J. Am. Chem. Soc.* **2012**, *134*, 14338.
- (33) Furukawa, H.; Gandara, F.; Zhang, Y.-B.; Jiang, J.; Queen, W. L.; Hudson, M. R.; Yaghi, O. M. *J. Am. Chem. Soc.* **2014**, *136*, 4369.
- (34) Bon, V.; Senkovskyy, V.; Senkovska, I.; Kaskel, S. *Chem. Commun.* **2012**, *48*, 8407.
- (35) Bon, V.; Senkovska, I.; Baburin, I. A.; Kaskel, S. *Cryst. Growth Des.* **2013**, *13*, 1231.
- (36) Yang, C.; Kaipa, U.; Mather, Q. Z.; Wang, X.; Nesterov, V.; Venero, A. F.; Omary, M. A. *J. Am. Chem. Soc.* **2011**, *133*, 18094.
- (37) Jeremias, F.; Khutia, A.; Henninger, S. K.; Janiak, C. *J. Mater. Chem.* **2012**, *22*, 10148.

- (38) Soubeyrand-Lenoir, E.; Vagner, C.; Yoon, J. W.; Bazin, P.; Ragon, F.; Hwang, Y. K.; Serre, C.; Chang, J.-S.; Llewellyn, P. L. *J. Am. Chem. Soc.* **2012**, *134*, 10174.
- (39) Cunha, D.; Ben Yahia, M.; Hall, S.; Miller, S. R.; Chevreau, H.; Elkaim, E.; Maurin, G.; Horcajada, P.; Serre, C. *Chem. Mater.* **2013**, *25*, 2767.
- (40) Khutia, A.; Rammelberg, H. U.; Schmidt, T.; Henninger, S.; Janiak, C. *Chem. Mater.* **2013**, *25*, 790.
- (41) Kim, S.-N.; Kim, J.; Kim, H.-Y.; Cho, H.-Y.; Ahn, W.-S. *Catal. Today* **2013**, *204*, 85.
- (42) Jeremias, F.; Lozan, V.; Henninger, S. K.; Janiak, C. *Dalton Trans.* **2013**, *42*, 15967.
- (43) Vaesen, S.; Guillerm, V.; Yang, Q. Y.; Wiersum, A. D.; Marszalek, B.; Gil, B.; Vimont, A.; Daturi, M.; Devic, T.; Llewellyn, P. L.; Serre, C.; Maurin, G.; De Weireld, G. *Chem. Commun.* **2013**, *49*, 10082.
- (44) Kang, I. J.; Khan, N. A.; Haque, E.; Jhung, S. H. *Chem. Eur. J.* **2011**, *17*, 6437.
- (45) Qian, X.; Yadian, B.; Wu, R.; Long, Y.; Zhou, K.; Zhu, B.; Huang, Y. *Int. J. Hydrogen Energy* **2013**, *38*, 16710.
- (46) Morris, W.; Voloskiy, B.; Demir, S.; Gandara, F.; McGrier, P. L.; Furukawa, H.; Cascio, D.; Stoddart, J. F.; Yaghi, O. M. *Inorg. Chem.* **2012**, *51*, 6443.
- (47) Padial, N. M.; Quartapelle Procopio, E.; Montoro, C.; Lopez, E.; Enrique Oltra, J.; Colombo, V.; Maspero, A.; Masciocchi, N.; Galli, S.; Senkovska, I.; Kaskel, S.; Barea, E.; Navarro, J. A. R. *Angew. Chem. Int. Ed.* **2013**, *52*, 8290.
- (48) Celic, T. B.; Mazaj, M.; Guillou, N.; Elkaaim, E.; El Roz, M.; Thibault-Starzyk, F.; Mali, G.; Rangus, M.; Cendak, T.; Kaucic, V.; Zabukovec Logar, N. *J. Phys. Chem. C* **2013**, *117*, 14608.

- (49) Weston, M. H.; Delaquil, A. A.; Sarjeant, A. A.; Farha, O. K.; Edu, J. H. N.; Nguyen, S. T. *Cryst. Growth Des.* **2013**, *13*, 2938.
- (50) Han, S.; Huang, Y.; Watanabe, T.; Nair, S.; Walton, K. S.; Sholl, D. S.; Meredith, C. J. *Microporous Mesoporous Mater.* **2013**, *173*, 86.
- (51) Mondloch, J. E.; Katz, M. J.; Planas, N.; Semrouni, D.; Gagliardi, L.; Hupp, J. T.; Farha, O. K. *Chem. Commun.* **2014**, 274.
- (52) Jiang, H.-L.; Feng, D.; Wang, K.; Gu, Z.-Y.; Wei, Z.; Chen, Y.-P.; Zhou, H.-C. *J. Am. Chem. Soc.* **2013**, *135*, 13934.
- (53) Ma, D.; Li, Y.; Li, Z. *Chem. Commun.* **2011**, *47*, 7377.
- (54) Liu, H.; Zhao, Y.; Zhang, Z.; Nijem, N.; Chabal, Y. J.; Zeng, H.; Li, J. *Adv. Funct. Mater.* **2011**, *21*, 4754.
- (55) Schoenecker, P. M.; Carson, C. G.; Jasuja, H.; Flemming, C. J. J.; Walton, K. S. *Ind. Eng. Chem. Res.* **2012**, *51*, 6513.
- (56) Guillerm, V.; Ragon, F.; Dan-Hardi, M.; Devic, T.; Vishnuvarthan, M.; Campo, B.; Vimont, A.; Clet, G.; Yang, Q.; Maurin, G.; Ferey, G.; Vittadini, A.; Gross, S.; Serre, C. *Angew. Chem. Int. Ed.* **2012**, *51*, 9267.
- (57) Cavka, J. H.; Jakobsen, S.; Olsbye, U.; Guillou, N.; Lamberti, C.; Bordiga, S.; Lillerud, K. P. *J. Am. Chem. Soc.* **2008**, *130*, 13850.
- (58) Yang, Q.; Guillerm, V.; Ragon, F.; Wiersum, A. D.; Llewellyn, P. L.; Zhong, C.; Devic, T.; Serre, C.; Maurin, G. *Chem. Commun.* **2012**, *48*, 9831.
- (59) DeCoste, J. B.; Peterson, G. W.; Jasuja, H.; Glover, T. G.; Huang, Y.-g.; Walton, K. S. *J. Mater. Chem. A* **2013**, *1*, 5642.
- (60) Jasuja, H.; Zang, J.; Sholl, D. S.; Walton, K. S. *J. Phys. Chem. C* **2012**, *116*, 23526.



- (61) Cmarik, G. E.; Kim, M.; Cohen, S. M.; Walton, K. S. *Langmuir* **2012**, *28*, 15606.
- (62) Kandiah, M.; Nilsen, M. H.; Usseglio, S.; Jakobsen, S.; Olsbye, U.; Tilset, M.; Larabi, C.; Quadrelli, E. A.; Bonino, F.; Lillerud, K. P. *Chem. Mater.* **2010**, *22*, 6632.
- (63) Jasuja, H.; Huang, Y.-g.; Walton, K. S. *Langmuir* **2012**, *28*, 16874.
- (64) Jasuja, H.; Burtch, N. C.; Huang, Y.-G.; Cai, Y.; Walton, K. S. *Langmuir* **2013**, *29*, 633.
- (65) Jasuja, H.; Walton, K. S. *Dalton Trans.* **2013**, *42*, 15421.
- (66) Reinsch, H.; van der Veen, M. A.; Gil, B.; Marszalek, B.; Verbiest, T.; de Vos, D.; Stock, N. *Chem. Mater.* **2012**, *25*, 17.
- (67) Biswas, S.; Remy, T.; Couck, S.; Denysenko, D.; Rampelberg, G.; Denayer, J. F. M.; Volkmer, D.; Detavernier, C.; Van Der Voort, P. *Phys. Chem. Chem. Phys.* **2013**, *15*, 3552.
- (68) Comotti, A.; Bracco, S.; Sozzani, P.; Horike, S.; Matsuda, R.; Chen, J.; Takata, M.; Kubota, Y.; Kitagawa, S. *J. Am. Chem. Soc.* **2008**, *130*, 13664.
- (69) Xiang, S.; He, Y.; Zhang, Z.; Wu, H.; Zhou, W.; Krishna, R.; Chen, B. *Nat. Commun.* **2012**, *3*, 954.
- (70) Yee, K. K.; Reimer, N.; Liu, J.; Cheng, S. Y.; Yiu, S. M.; Weber, J.; Stock, N.; Xu, Z. T. *J. Am. Chem. Soc.* **2013**, *135*, 7795.
- (71) Kundu, T.; Sahoo, S. C.; Saha, S.; Banerjee, R. *Chem. Commun.* **2013**, *49*, 5262.
- (72) Yoon, J. W.; Jhung, S. H.; Hwang, Y. K.; Humphrey, S. M.; Wood, P. T.; Chang, J.-S. *Adv. Mater.* **2007**, *19*, 1830.

- (73) Chen, T. H.; Popov, I.; Zenasni, O.; Daugulis, O.; Miljanic, O. S. *Chem. Commun.* **2013**, *49*, 6846.
- (74) Mohamed, M. H.; Elsaidi, S. K.; Wojtas, L.; Pham, T.; Forrest, K. A.; Tudor, B.; Space, B.; Zaworotko, M. J. *J. Am. Chem. Soc.* **2012**, *134*, 19556.
- (75) Gu, J.-Z.; Lu, W.-G.; Jiang, L.; Zhou, H.-C.; Lu, T.-B. *Inorg. Chem.* **2007**, *46*, 5835.
- (76) Nagarkar, S. S.; Chaudhari, A. K.; Ghosh, S. K. *Inorg. Chem.* **2012**, *51*, 572.
- (77) Kundu, T.; Sahoo, S. C.; Banerjee, R. *Cryst. Growth Des.* **2012**, *12*, 4633.
- (78) Lin, X.; Blake, A. J.; Wilson, C.; Sun, X. Z.; Champness, N. R.; George, M. W.; Hubberstey, P.; Mokaya, R.; Schroder, M. *J. Am. Chem. Soc.* **2006**, *128*, 10745.
- (79) Zhai, F.; Zheng, Q.; Chen, Z.; Ling, Y.; Liu, X.; Weng, L.; Zhou, Y. *CrystEngComm* **2013**, *15*, 2040.
- (80) Santra, A.; Senkovska, I.; Kaskel, S.; Bharadwaj, P. K. *Inorg. Chem.* **2013**, *52*, 7358.
- (81) Hou, C.; Liu, Q.; Wang, P.; Sun, W.-Y. *Microporous Mesoporous Mater.* **2013**, *172*, 61.
- (82) Li, Y.; Ju, Z.; Wu, B.; Yuan, D. *Cryst. Growth Des.* **2013**, *13*, 4125.
- (83) Liu, H.; Zhao, Y.; Zhang, Z.; Nijem, N.; Chabal, Y. J.; Peng, X.; Zeng, H.; Li, J. *Chem. Asian J.* **2013**, *8*, 674.
- (84) Deria, P.; Mondloch, J. E.; Tylianakis, E.; Ghosh, P.; Bury, W.; Snurr, R. Q.; Hupp, J. T.; Farha, O. K. *J. Am. Chem. Soc.* **2013**, *135*, 16801.
- (85) Jiang, H.-L.; Feng, D.; Liu, T.-F.; Li, J.-R.; Zhou, H.-C. *J. Am. Chem. Soc.* **2012**, *134*, 14690.

- (86) Nugent, P.; Belmabkhout, Y.; Burd, S. D.; Cairns, A. J.; Luebke, R.; Forrest, K.; Pham, T.; Ma, S.; Space, B.; Wojtas, L.; Eddaoudi, M.; Zaworotko, M. J. *Nature* **2013**, *495*, 80.
- (87) Xue, D.-X.; Cairns, A. J.; Belmabkhout, Y.; Wojtas, L.; Liu, Y.; Alkordi, M. H.; Eddaoudi, M. *J. Am. Chem. Soc.* **2013**, *135*, 7660.
- (88) Zhang, W.; Huang, H.; Liu, D.; Yang, Q.; Xiao, Y.; Ma, Q.; Zhong, C. *Microporous Mesoporous Mater.* **2013**, *171*, 118.
- (89) Biswas, S.; Van Der Voort, P. *Eur. J. Inorg. Chem.* **2013**, *2013*, 2154.
- (90) Biswas, S.; Zhang, J.; Li, Z. B.; Liu, Y. Y.; Grzywa, M.; Sun, L. X.; Volkmer, D.; Van der Voort, P. *Dalton Trans.* **2013**, *42*, 4730.
- (91) Jasuja, H.; Walton, K. S. *J. Phys. Chem. C* **2013**, *117*, 7062.
- (92) Uemura, K.; Onishi, F.; Yamasaki, Y.; Kita, H. *J. Solid State Chem.* **2009**, *182*, 2852.
- (93) Wade, C. R.; Corrales-Sanchez, T.; Narayan, T. C.; Dinca, M. *Energy Environ. Sci.* **2013**, *6*, 2172.
- (94) Wissmann, G.; Schaate, A.; Lilienthal, S.; Bremer, I.; Schneider, A. M.; Behrens, P. *Microporous Mesoporous Mater.* **2012**, *152*, 64.
- (95) Kizzie, A. C.; Wong-Foy, A. G.; Matzger, A. J. *Langmuir* **2011**, *27*, 6368.
- (96) Chmelik, C.; Mundstock, A.; Dietzel, P. D. C.; Caro, J. *Microporous Mesoporous Mater.* **2014**, *183*, 117.
- (97) Rezk, A.; Al-Dadah, R.; Mahmoud, S.; Elsayed, A. *Proc. Inst. Mech. Eng. Part C- J. Mech. Eng. Sci.* **2013**, *227*, 992.
- (98) Liu, J.; Benin, A. I.; Furtado, A. M. B.; Jakubczak, P.; Willis, R. R.; LeVan, M. D. *Langmuir* **2011**, *27*, 11451.

- (99) Remy, T.; Peter, S. A.; Van der Perre, S.; Valvekens, P.; De Vos, D. E.; Baron, G. V.; Denayer, J. F. M. *J. Phys. Chem. C* **2013**, *117*, 9301.
- (100) Karra, J. R.; Grabicka, B. E.; Huang, Y.-G.; Walton, K. S. *J. Colloid Interface Sci.* **2013**, *392*, 331.
- (101) Liang, Z.; Marshall, M.; Chaffee, A. L. *Microporous Mesoporous Mater.* **2010**, *132*, 305.
- (102) Tan, K.; Nijem, N.; Canepa, P.; Gong, Q.; Li, J.; Thonhauser, T.; Chabal, Y. J. *Chem. Mater.* **2012**, *24*, 3153.
- (103) Wu, T.; Shen, L.; Luebbbers, M.; Hu, C.; Chen, Q.; Ni, Z.; Masel, R. I. *Chem. Commun.* **2010**, *46*, 6120.
- (104) Cai, Y.; Zhang, Y.; Huang, Y.; Marder, S. R.; Walton, K. S. *Cryst. Growth Des.* **2012**, *12*, 3709.
- (105) Yang, J.; Grzech, A.; Mulder, F. M.; Dingemans, T. J. *Chem. Commun.* **2011**, *47*, 5244.
- (106) Nguyen, J. G.; Cohen, S. M. *J. Am. Chem. Soc.* **2010**, *132*, 4560.
- (107) Makal, T. A.; Wang, X.; Zhou, H.-C. *Cryst. Growth Des.* **2013**, *13*, 4760.
- (108) Schaate, A.; Duehnen, S.; Platz, G.; Lilienthal, S.; Schneider, A. M.; Behrens, P. *Eur. J. Inorg. Chem.* **2012**, 790.
- (109) Yang, S.; Chen, C.; Yan, Z.; Cai, Q.; Yao, S. *J. Sep. Sci.* **2013**, *36*, 1283.
- (110) Li, Y.; Yang, R. T. *Langmuir* **2007**, *23*, 12937.
- (111) Saha, D.; Deng, S. *J. Phys. Chem. Lett.* **2010**, *1*, 73.
